# Supplementary material for: Infection or a third dose of mRNA vaccine elicits neutralizing antibody responses against SARS-CoV-2 in kidney transplant recipients
Source: PubMed Central journal article supplement (PMC8939774; doi:10.1126/scitranslmed.abl6141), 2022-02-01
Supplement: scitranslmed.abl6141_sm.pdf [file scitranslmed.abl6141_sm.pdf]

Supplementary Materials for

**Infection or a third dose of mRNA vaccine elicit neutralizing antibody responses against SARS-CoV-2 in kidney transplant recipients**

Xavier Charmetant *et al.*

Corresponding author: Olivier Thauvat, [olivier.thauvat@chu-lyon.fr](mailto:olivier.thauvat@chu-lyon.fr)

DOI: 10.1126/scitranslmed.abl6141

**The PDF file includes:**

Fig. S1  
Table S1

**Other Supplementary Material for this manuscript includes the following:**

MDAR Reproducibility Checklist  
Data file S1

## Supplementary materials

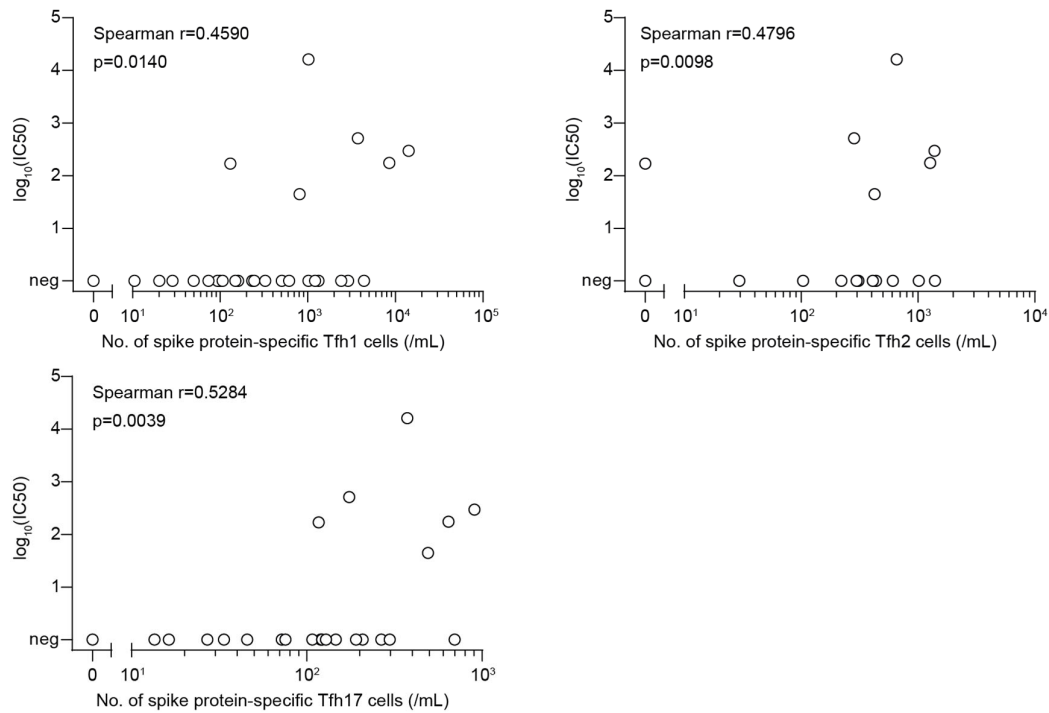

**Fig. S1.** Correlations between Tfh subpopulations and the viral neutralization capacity of the serum. The correlations between the number of spike protein-specific Tfh1, Tfh2, or Tfh17 cells and the viral neutralization capacity of the serum are shown. The results of Spearman correlation test are shown on the graphs. Tfh, T follicular helper. Neg indicates absence of neutralizing antibodies.

**Table S1. Clinical characteristics of epidemiological and COVATRHS cohorts.**

| n (%) or median [IQR]                 | Epidemiological cohort |                      | p <sup>1</sup>   | COVATRHS cohort  |                    | p <sup>2</sup>   | Inf<br>p <sup>3</sup> | Vac<br>p <sup>4</sup> |
|---------------------------------------|------------------------|----------------------|------------------|------------------|--------------------|------------------|-----------------------|-----------------------|
|                                       | Infected<br>n= 137     | Vaccinated<br>n= 736 |                  | Infected<br>n=21 | Vaccinated<br>n=29 |                  |                       |                       |
| <b>Age (y)</b>                        | 59.9 [49.7-68.9]       | 57.7 [49.1-67.3]     | 0.219            | 54.9 [36.9-60.4] | 56.4 [43.4-69.6]   | 0.314            | 0.057                 | 0.819                 |
| <b>Male</b>                           | 88 (64)                | 439 (60)             | 0.361            | 12 (57)          | 18 (62)            | 0.726            | 0.530                 | 0.794                 |
| <b>BMI (kg/m<sup>2</sup>)</b>         | 26.0 [23.0-31.0]       | 26.0 [22.6-30.0]     | 0.404            | 25.0 [22.5-30.0] | 24.2 [23.4-27.5]   | 0.603            | 0.543                 | 0.259                 |
| <b>Time since transplantation (y)</b> | 6.18 [2.14-12.6]       | 6.41 [2.94-13.1]     | 0.176            | 2.0 [1.35-7.53]  | 7.04 [2.19-16.2]   | <b>0.017</b>     | <b>0.027</b>          | 0.846                 |
| <b>Donor type</b>                     |                        |                      | 0.652            |                  |                    | 0.08             | 0.140                 | 0.544                 |
| Deceased                              | 106 (77)               | 602 (82)             |                  | 13 (62)          | 25 (86)            |                  |                       |                       |
| Living                                | 27 (20)                | 134 (18)             |                  | 7 (33)           | 4 (14)             |                  |                       |                       |
| NA                                    | 4 (3)                  | 0                    |                  | 1 (5)            | 0                  |                  |                       |                       |
| <b>Comorbidities</b>                  |                        |                      |                  |                  |                    |                  |                       |                       |
| Cardiovascular disease                | 48 (35)                | 226 (31)             | 0.367            | 4 (19)           | 21 (72)            | <b>&lt;0.001</b> | 0.146                 | <b>&lt;0.001</b>      |
| Diabetes                              | 58 (42)                | 263 (36)             | 0.169            | 7 (33)           | 3 (10)             | <b>0.045</b>     | 0.435                 | <b>0.005</b>          |
| <b>Induction</b>                      |                        |                      | <b>&lt;0.001</b> |                  |                    | 0.087            | 0.797                 | 0.743                 |
| Anti-thymocyte globulins              | 47 (34)                | 418 (57)             |                  | 8 (38)           | 17 (59)            |                  |                       |                       |
| Basiliximab                           | 80 (58)                | 254 (34)             |                  | 12 (57)          | 9 (31)             |                  |                       |                       |
| No induction                          | 7 (5)                  | 38 (5)               |                  | 0                | 0                  |                  |                       |                       |
| NA                                    | 3 (2)                  | 26 (4)               |                  | 1 (5)            | 1 (3)              |                  |                       |                       |
| <b>Immunosuppressive drugs</b>        |                        |                      |                  |                  |                    |                  |                       |                       |
| CNI                                   | 126 (92)               | 659 (90)             | 0.385            | 19 (90)          | 28 (97)            | 0.372            | 0.817                 | 0.221                 |
| MMF/MPA                               | 109 (80)               | 582 (80)             | 0.898            | 19 (90)          | 22 (76)            | 0.184            | 0.235                 | 0.677                 |
| Steroids                              | 89 (65)                | 493 (67)             | 0.645            | 14 (67)          | 19 (66)            | 0.932            | 0.879                 | 0.869                 |
| imTOR                                 | 22 (16)                | 126 (17)             | 0.751            | 1 (5)            | 3 (10)             | 0.472            | 0.172                 | 0.336                 |
| Belatacept                            | 3 (2)                  | 24 (3)               | 0.506            | 2 (10)           | 1 (3)              | 0.372            | 0.074                 | 0.956                 |
| Imurel                                | 3 (2)                  | 16 (2)               | 0.991            | 0                | 0                  | NA               | NA                    | NA                    |

Qualitative variables were compared using a Chi-square test, quantitative variables were compared using a Mann Whitney test.

Significant p-values are in bold. p<sup>1</sup> was the comparison between infected (Inf) and vaccinated (Vac) patients from the epidemiological

cohort;  $p^2$  was the comparison between infected and vaccinated patients from the biological cohort;  $p^3$  was the comparison between infected patients from the epidemiological and biological cohorts;  $p^4$  was the comparison between vaccinated patients from the epidemiological and biological cohorts. IQR, interquartile range; BMI, body mass index; SD, standard deviation; y, years; NA, not available; CNI, calcineurin inhibitor; MMF/MPA, mycophenolate mofetil/mycophenolic acid; imTOR, inhibitors of the mechanistic target of rapamycin.
